# Supplementary material for: Who gets lost and why: A representative cross-sectional survey on sociodemographic and vestibular determinants of wayfinding strategies
Source: PubMed Central journal article supplement (PMC6353538; doi:10.1371/journal.pone.0204781), 2019-01-30
Supplement: pone.0204781.s003.pdf [file pone.0204781.s003.pdf]

**Appendix 2. Combination in the multinomial regression model (n = 783).** Odds ratios (OR), Confidence Intervals (CI) and p-values (p). Outcomes were individually weighted according to frequency distribution of the current population. OR >1 means it is more likely to be part of the group of interest.

|                                       |             | Odds(Both strategies:none strategy) |                |                 |      | Odss (orientation strategy: route strategy) |                |                 |      | Odds (orientation strategy: both strategies) |                |                 |      |
|---------------------------------------|-------------|-------------------------------------|----------------|-----------------|------|---------------------------------------------|----------------|-----------------|------|----------------------------------------------|----------------|-----------------|------|
|                                       |             | Exp(B)                              | CI:lower limit | CI: upper limit | p    | Exp(B)                                      | CI:lower limit | CI: upper limit | p    | Exp(B)                                       | CI:lower limit | CI: upper limit | p    |
| gender (ref: woman)                   |             | 1.75                                | 1.19           | 2.58            | 0.01 | 1.72                                        | 1.00           | 2.95            | 0.05 | 1.32                                         | 0.82           | 2.13            | 0.26 |
| Age (ref: 18-35)                      | 36-55       | 2.35                                | 1.42           | 3.89            | 0.00 | 0.26                                        | 0.13           | 0.52            | 0.00 | 0.22                                         | 0.11           | 0.41            | 0.00 |
|                                       | 56-70       | 1.31                                | 0.74           | 2.32            | 0.36 | 0.64                                        | 0.29           | 1.42            | 0.27 | 0.42                                         | 0.21           | 0.84            | 0.01 |
|                                       | 71-96       | 1.78                                | 0.92           | 3.46            | 0.09 | 2.54                                        | 1.00           | 6.45            | 0.05 | 0.87                                         | 0.42           | 1.78            | 0.70 |
| education <sup>1</sup> (ref: primary) | secondary   | 1.49                                | 0.94           | 2.36            | 0.09 | 0.92                                        | 0.48           | 1.76            | 0.80 | 0.72                                         | 0.41           | 1.27            | 0.26 |
|                                       | upper 2nd   | 3.04                                | 1.55           | 5.98            | 0.00 | 0.25                                        | 0.09           | 0.65            | 0.01 | 0.22                                         | 0.09           | 0.55            | 0.00 |
|                                       | tertiary    | 4.58                                | 2.44           | 8.60            | 0.00 | 0.62                                        | 0.26           | 1.48            | 0.28 | 0.27                                         | 0.12           | 0.58            | 0.00 |
| income (ref: lowest)                  | 2nd lowest  | 0.54                                | 0.32           | 0.91            | 0.02 | 0.94                                        | 0.46           | 1.90            | 0.85 | 1.48                                         | 0.80           | 2.74            | 0.22 |
|                                       | 2nd highest | 0.85                                | 0.48           | 1.49            | 0.56 | 0.86                                        | 0.38           | 1.97            | 0.73 | 0.83                                         | 0.41           | 1.70            | 0.62 |
|                                       | highest     | 0.63                                | 0.35           | 1.16            | 0.14 | 1.72                                        | 1.00           | 2.95            | 0.05 | 1.21                                         | 0.59           | 2.52            | 0.60 |
| bik-region <sup>2</sup> (>20.000)     | 20-50k      | 0.76                                | 0.38           | 1.53            | 0.45 | 1.00                                        | 0.38           | 2.58            | 0.99 | 2.31                                         | 0.94           | 5.67            | 0.07 |
|                                       | 50-100k     | 0.94                                | 0.57           | 1.57            | 0.82 | 3.32                                        | 1.51           | 7.29            | 0.00 | 2.90                                         | 1.48           | 5.70            | 0.00 |
|                                       | <500k       | 1.15                                | 0.70           | 1.88            | 0.59 | 1.08                                        | 0.50           | 2.35            | 0.84 | 1.68                                         | 0.84           | 3.39            | 0.14 |
| sense of balance (ref: same)          | worse       | 1.74                                | 0.81           | 3.75            | 0.16 | 0.82                                        | 0.46           | 1.47            | 0.52 | 1.33                                         | 0.55           | 3.22            | 0.52 |
|                                       | better      | 1.90                                | 1.26           | 2.86            | 0.00 | 0.94                                        | 0.37           | 2.36            | 0.90 | 0.61                                         | 0.37           | 1.01            | 0.06 |
| vertigo (ref: no)                     | yes         | 2.57                                | 1.59           | 4.14            | 0.00 | 1.78                                        | 0.89           | 3.57            | 0.10 | 1.04                                         | 0.55           | 1.99            | 0.90 |

  

|                                       |             | Odds (route strategy: both strategies) |                |                 |      | Odds (orientation strategy: none strategy) |                |                 |      | Odds (route strategy: none strategy) |                |                 |      |
|---------------------------------------|-------------|----------------------------------------|----------------|-----------------|------|--------------------------------------------|----------------|-----------------|------|--------------------------------------|----------------|-----------------|------|
|                                       |             | Exp(B)                                 | CI:lower limit | CI: upper limit | p    | Exp(B)                                     | CI:lower limit | CI: upper limit | p    | Exp(B)                               | CI:lower limit | CI: upper limit | p    |
| gender (ref: woman)                   |             | 0.77                                   | 0.50           | 1.18            | 0.22 | 2.30                                       | 1.41           | 3.75            | 0.00 | 1.34                                 | 0.85           | 2.11            | 0.21 |
| Age (ref: 18-35)                      | 36-55       | 0.83                                   | 0.49           | 1.43            | 0.51 | 0.51                                       | 0.27           | 0.98            | 0.04 | 1.96                                 | 1.12           | 3.44            | 0.02 |
|                                       | 56-70       | 0.65                                   | 0.33           | 1.30            | 0.22 | 0.55                                       | 0.28           | 1.08            | 0.08 | 0.85                                 | 0.43           | 1.68            | 0.65 |
|                                       | 71-96       | 0.34                                   | 0.14           | 0.82            | 0.02 | 1.54                                       | 0.75           | 3.15            | 0.24 | 0.61                                 | 0.25           | 1.46            | 0.27 |
| education <sup>1</sup> (ref: primary) | secondary   | 0.78                                   | 0.45           | 1.37            | 0.39 | 1.07                                       | 0.61           | 1.87            | 0.81 | 1.17                                 | 0.68           | 2.01            | 0.58 |
|                                       | upper 2nd   | 0.89                                   | 0.44           | 1.81            | 0.75 | 0.66                                       | 0.26           | 1.69            | 0.39 | 2.71                                 | 1.29           | 5.71            | 0.01 |
|                                       | tertiary    | 0.43                                   | 0.22           | 0.85            | 0.02 | 1.22                                       | 0.54           | 2.80            | 0.63 | 1.99                                 | 0.95           | 4.17            | 0.07 |
| income (ref: lowest)                  | 2nd lowest  | 1.58                                   | 0.86           | 2.92            | 0.14 | 0.79                                       | 0.43           | 1.46            | 0.46 | 0.85                                 | 0.46           | 1.56            | 0.60 |
|                                       | 2nd highest | 0.97                                   | 0.50           | 1.87            | 0.92 | 0.71                                       | 0.34           | 1.48            | 0.36 | 0.82                                 | 0.41           | 1.63            | 0.57 |
|                                       | highest     | 0.77                                   | 0.50           | 1.18            | 0.22 | 2.30                                       | 1.41           | 3.75            | 0.00 | 1.16                                 | 0.58           | 2.33            | 0.68 |
| bik-region <sup>2</sup> (>20.000)     | 20k-50k     | 2.32                                   | 1.10           | 4.90            | 0.03 | 1.76                                       | 0.73           | 4.26            | 0.21 | 1.77                                 | 0.84           | 3.74            | 0.14 |
|                                       | 50k-100k    | 0.87                                   | 0.47           | 1.64            | 0.68 | 2.74                                       | 1.40           | 5.34            | 0.00 | 0.82                                 | 0.44           | 1.56            | 0.55 |
|                                       | <500k       | 1.56                                   | 0.88           | 2.75            | 0.13 | 1.93                                       | 0.95           | 3.90            | 0.07 | 1.78                                 | 0.99           | 3.21            | 0.05 |
| sense of balance (ref: same)          | worse       | 0.74                                   | 0.47           | 1.18            | 0.20 | 1.16                                       | 0.69           | 1.96            | 0.58 | 1.41                                 | 0.86           | 2.30            | 0.17 |
|                                       | better      | 1.42                                   | 0.63           | 3.19            | 0.40 | 2.32                                       | 0.99           | 5.46            | 0.05 | 2.47                                 | 1.12           | 5.45            | 0.03 |
| vertigo (ref: no)                     | yes         | 0.59                                   | 0.34           | 1.02            | 0.06 | 2.68                                       | 1.45           | 4.96            | 0.00 | 1.50                                 | 0.88           | 2.56            | 0.13 |

<sup>1</sup> Categorization of German academic achievement according to ISCED 1997:

Primary education/lower secondary education=Volks-/Hauptschulabschluss

Lower Secondary education=German Realschulabschluss and further education without diploma "Abitur" as well as current students/pupils

Upper secondary education=Abitur/(Fach)hochschulreife

Tertiary education=diploma for university and higher degree

<sup>2</sup> BIK-regions=measure of regional urbanization and are classified by the number of inhabitants
